# Supplementary material
Source: MDPI journal article supplement (https://www.mdpi.com/2077-0472/8/4/51)
Supplement: s1 [file s1]

**Appendix Table A.** Number of articles by Journal

| <b>Journal</b>                                   | <b>Frequency</b> | <b>Percentage</b> |
|--------------------------------------------------|------------------|-------------------|
| J. of Int. Business Studies                      | 6                | 5.45%             |
| J. of Mgt                                        | 1                | 0.91%             |
| J. of Int. Marketing                             | 2                | 1.81%             |
| J. of Business Research                          | 7                | 6.36%             |
| British J. of Mgt                                | 2                | 1.81%             |
| J. of Business and Industrial Marketing          | 2                | 1.81%             |
| J. of Rural Studies                              | 4                | 3.63%             |
| European Review of Agricultural Economics        | 2                | 1.81%             |
| Industrial Marketing Management                  | 9                | 8.18%             |
| Scandinavian J. of Mgt                           | 1                | 0.91%             |
| J. of the Academy of Marketing science           | 2                | 1.81%             |
| Int. J. of production economics                  | 4                | 3.63%             |
| J. of Supply Chain Mgt                           | 1                | 0.91%             |
| J. of Operations Mgt                             | 8                | 7.27%             |
| Systems Research & Behavioral Science            | 1                | 0.91%             |
| Int. J. of Information Mgt                       | 1                | 0.91%             |
| Mgt Int. Review                                  | 1                | 0.91%             |
| J. of Purchasing & Supply Mgt                    | 1                | 0.91%             |
| Strategic Mgt J.                                 | 9                | 8.18%             |
| Int. Marketing Review                            | 1                | 0.91%             |
| J. of Marketing Research                         | 2                | 1.81%             |
| Int. J. of physical Distribution & Logistics Mgt | 2                | 1.81%             |
| Organization Science                             | 3                | 2.72%             |
| Agricultural Economics                           | 3                | 2.72%             |
| Chinese Mgt Studies                              | 2                | 1.81%             |
| Supply Chain Mgt. An Int. J.                     | 1                | 0.91%             |
| China Agricultural Economic Review               | 2                | 1.81%             |
| Int. J. of Service Industry Mgt                  | 1                | 0.91%             |
| Int. Business Review                             | 1                | 0.91%             |
| Mgt. Accounting Research                         | 1                | 0.91%             |
| Decision Sciences Journal                        | 1                | 0.91%             |
| Int. J. of Project Mgt                           | 2                | 1.81%             |
| J. of Marketing                                  | 4                | 3.63%             |
| Int. Food & Agribusiness Mgt Review              | 1                | 0.91%             |
| Meat Science                                     | 1                | 0.91%             |
| J. of Mgt Information systems                    | 2                | 1.81%             |
| Operations Mgt Research                          | 1                | 0.91%             |
| J. of Mgt & Governance                           | 1                | 0.91%             |
| J. of Marketing Theory & Practice                | 1                | 0.91%             |
| J. of Mgt Governance                             | 1                | 0.91%             |
| J. of Strategic Marketing                        | 2                | 1.81%             |
| J. of Chains and Network Science                 | 1                | 0.91%             |
| J. of Marketing Mgt                              | 1                | 0.91%             |
| J, of Operations & Production Mgt                | 1                | 0.91%             |
| J. of Business Logistics                         | 1                | 0.91%             |
| European J. of Marketing                         | 1                | 0.91%             |

|                                         |     |       |
|-----------------------------------------|-----|-------|
| J. of Cleaner Productions               | 2   | 1.81% |
| J. of the science of food & Agriculture | 1   | 0.91% |
| Agricultural & food economics           | 1   | 0.91% |
| <hr/>                                   |     |       |
| Total number of articles                | 110 | 100%  |

**Notes:** J.: Journal, Mgt: Management, Int.: International
